# Supplementary material for: Both Adaptability and Endophytic Bacteria Are Linked to the Functional Traits in the Invasive Clonal Plant Wedelia trilobata
Source: MDPI journal article supplement (doi:10.3390/plants11233369), 2022-12-04
Supplement: s1 [file s1]

# Supplementary Materials

## Both Adaptability and Endophytic Bacteria Are Linked to the Functional Traits in the Invasive Clonal Plant *Wedelia trilobata*

Ying-Hao Mei <sup>1,2</sup>, Xu Li <sup>2</sup>, Jian-Yu Zhou <sup>2</sup>, Fang-Li Kong <sup>2</sup>, Shan-Shan Qi <sup>3</sup>, Bin Zhu <sup>4</sup>, Misbah Naz <sup>2</sup>, Zhi-Cong Dai <sup>1,2,5,\*</sup> and Dao-Lin Du <sup>1,2</sup>

<sup>1</sup> School of Emergency Management, Jiangsu University, Zhenjiang 212013, China

<sup>2</sup> School of the Environmental and Safety Engineering, Jiangsu University, Zhenjiang 212013, China

<sup>3</sup> School of the Agricultural Engineering, Jiangsu University, Zhenjiang 212013, China

<sup>4</sup> Department of Biology, University of Hartford, West Hartford, CT 06117, USA

<sup>5</sup> Jiangsu Collaborative Innovation Center of Technology and Material of Water Treatment, Suzhou University of Science and Technology, Suzhou 215009, China

\* Correspondence: daizhicong@163.com



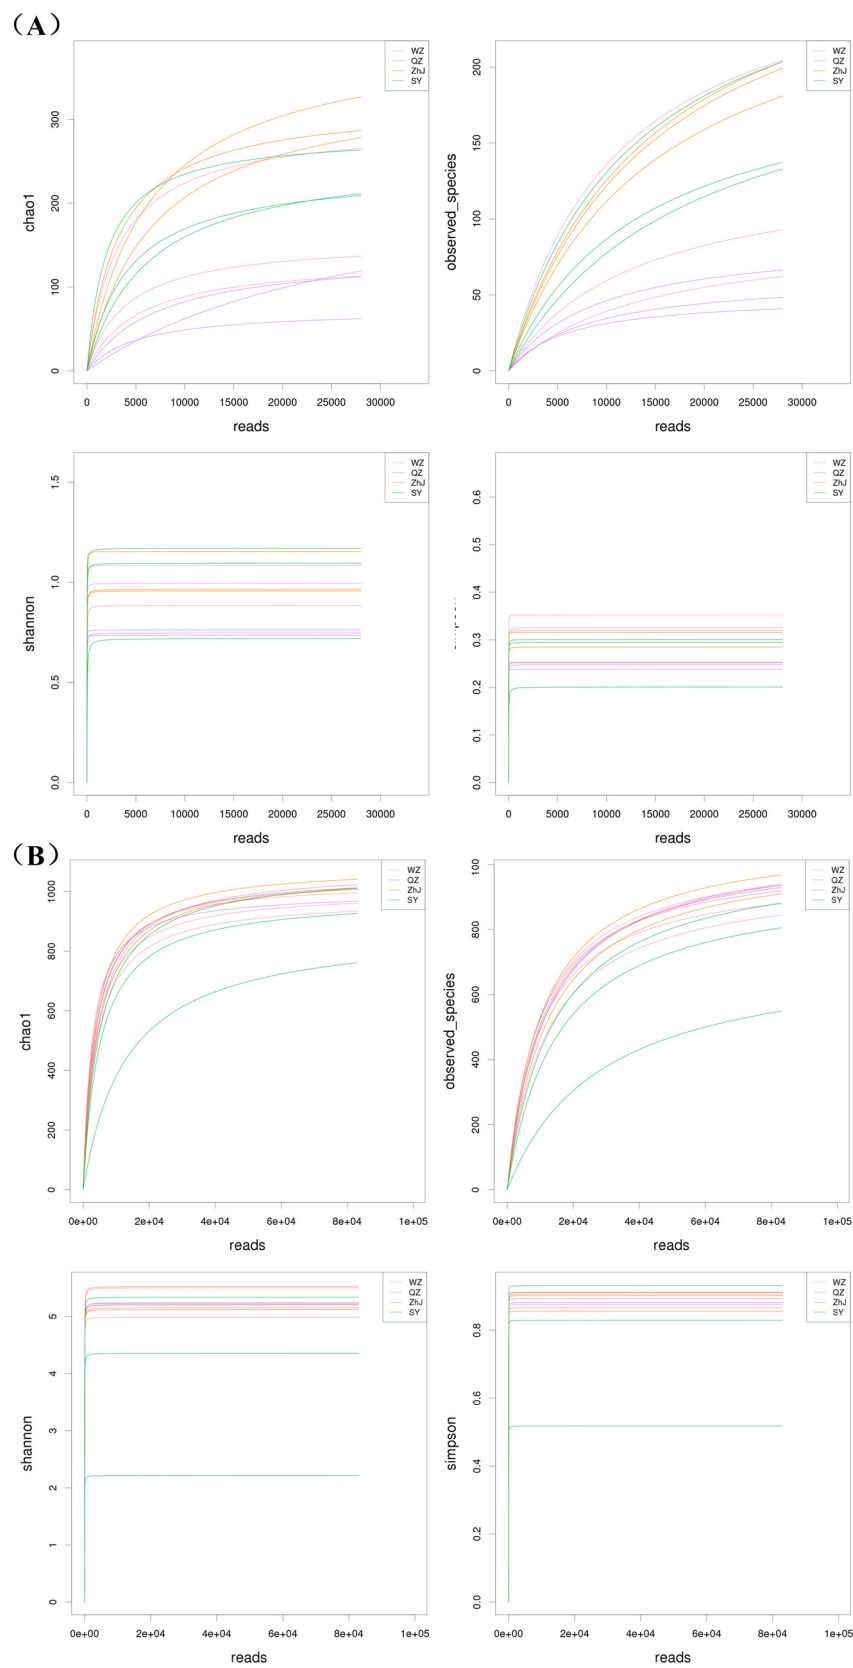

**Figure S1:** Rarefaction curve of endophytic bacteria (A) and fungi (B) in four populations of *W. trilobata*.



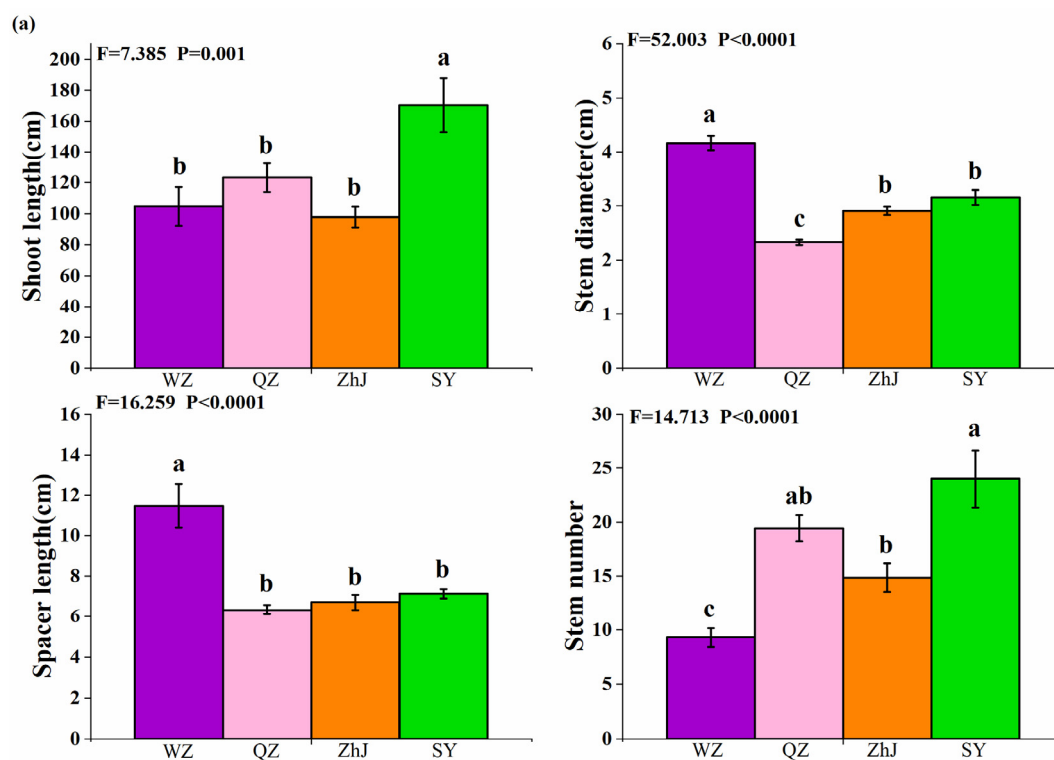

**Figure S2:** Phenotypic growth index of four populations of *W. trilobata* collecting from different regions (WZ, Wenzhou City; QZ, Quanzhou City; ZhJ, Zhanjiang City; SY, Sanya City). Bars (mean with standard error, n = 7) with different lowercase letters represent statistically significant differences ( $P \leq 0.05$ ).

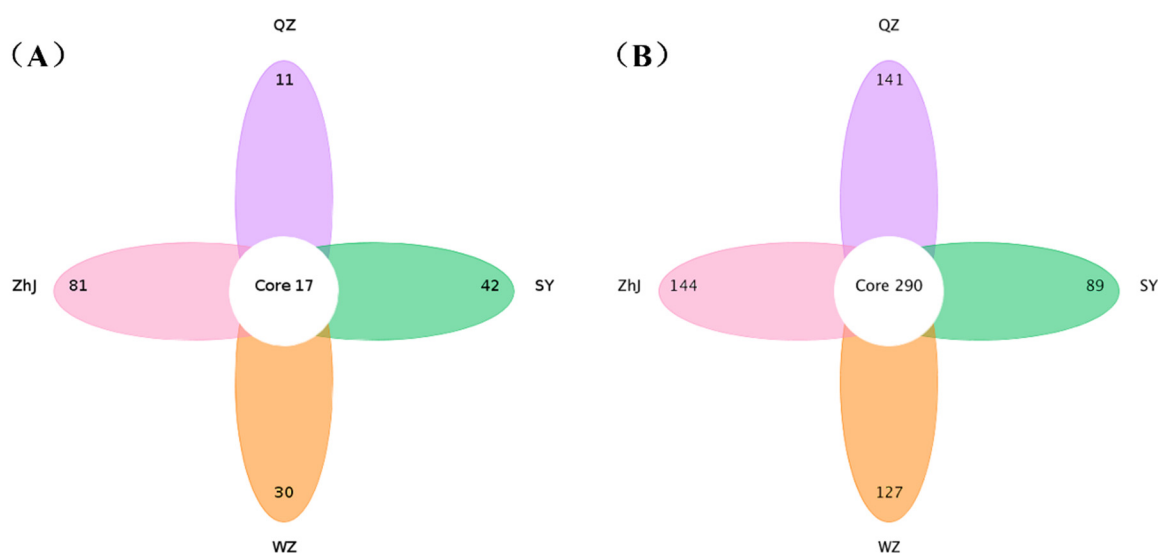

**Figure S3.** Petal pattern analysis of endophytic bacteria (A) and fungi (B) in four populations of *W. trilobata*.



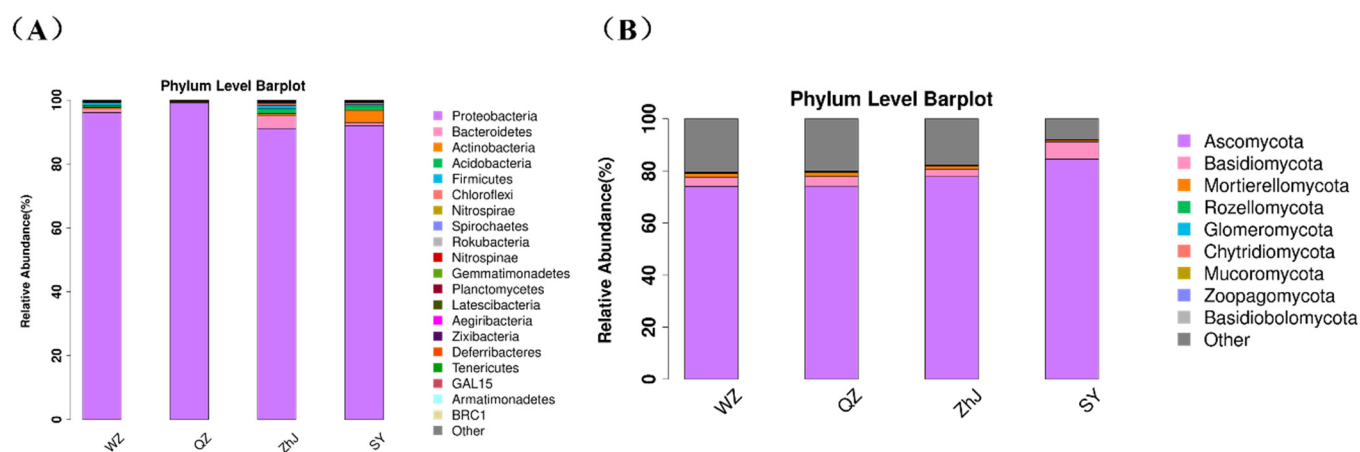

**Figure S4.** The relative abundance of endophytic bacterial (A) and fungal (B) communities of four populations of *W. trilobata* at the phylum level.

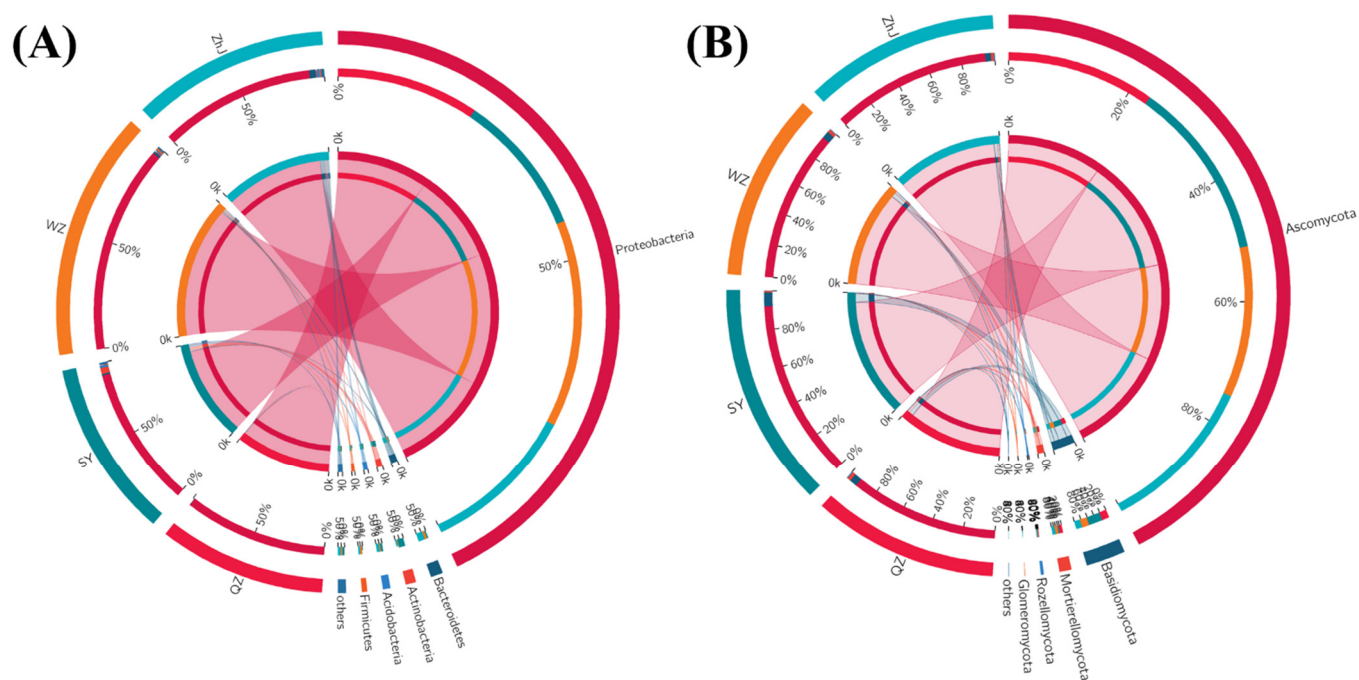

**Figure S5.** Circos analysis of endophytic bacteria (A) and fungi (B) in four populations of *W. trilobata* at phylum level.



**Table S1.** Sequencing evaluation of bacterial and fungal community in four populations of *W. trilobata*.

|                  | Group | Clean_tags | Effective_tags | OTUs | Goods_coverage |
|------------------|-------|------------|----------------|------|----------------|
| <b>Bacterial</b> | WZ    | 201995     | 194982         | 478  | 0.998          |
|                  | QZ    | 249494     | 241884         | 268  | 0.999          |
|                  | ZhJ   | 280307     | 267232         | 860  | 0.997          |
|                  | SY    | 199289     | 191401         | 662  | 0.998          |
| <b>Fungal</b>    | WZ    | 365075     | 348583         | 2820 | 0.998          |
|                  | QZ    | 301155     | 286795         | 2857 | 0.998          |
|                  | ZhJ   | 333131     | 316938         | 2947 | 0.998          |
|                  | SY    | 379471     | 369108         | 2483 | 0.997          |
